# Supplementary material for: Omentin-1 Modulates Macrophage Function via Integrin Receptors αvβ3 and αvβ5 and Reverses Plaque Vulnerability in Animal Models of Atherosclerosis
Source: PubMed Central journal article supplement (PMC8593239; doi:10.3389/fcvm.2021.757926), 2021-11-02
Supplement: Data_Sheet_7.pdf [file Data_Sheet_7.pdf]

## Major Resources Table

### Animals (in vivo studies)

| Species                   | Vendor or Source                                 | Background Strain | Sex  | Persistent ID / URL                                                                                                                   |
|---------------------------|--------------------------------------------------|-------------------|------|---------------------------------------------------------------------------------------------------------------------------------------|
| ApoE <sup>-/-</sup> Mouse | Beijing Vital River Laboratory Animal Technology | C57BL/6           | Male | <a href="http://www.lascn.net/Item/15349.aspx">http://www.lascn.net/Item/15349.aspx</a>                                               |
| Ldlr <sup>-/-</sup> Mouse | Guangzhou Cyagen Biosciences Inc                 | C57BL/6           | Male | <a href="https://www.cyagen.com/cn/zh-cn/?bd_vid=8597238793985968757">https://www.cyagen.com/cn/zh-cn/?bd_vid=8597238793985968757</a> |

### Antibodies

| Target antigen       | Vendor or Source | Catalog # | Working concentration                                       | Lot # (preferred but not required) | Persistent ID / URL                                                                                                                                                                                       |
|----------------------|------------------|-----------|-------------------------------------------------------------|------------------------------------|-----------------------------------------------------------------------------------------------------------------------------------------------------------------------------------------------------------|
| $\alpha\beta 3$      | Santa Cruz       | sc-7312   | IF: 1:50-1:100                                              |                                    | <a href="https://www.scbt.com/p/integrin-alphav-beta3-antibody-23c6?requestFrom=search">https://www.scbt.com/p/integrin-alphav-beta3-antibody-23c6?requestFrom=search</a>                                 |
| $\alpha\beta 5$      | Santa Cruz       | sc-13588  | IF:1:50                                                     |                                    | <a href="https://www.scbt.com/p/integrin-alphav-beta5-antibody-p1f76?requestFrom=search">https://www.scbt.com/p/integrin-alphav-beta5-antibody-p1f76?requestFrom=search</a>                               |
| $\alpha\beta 3$      | R&D              | MAB3050   | Co-IP: 1:50                                                 |                                    | <a href="https://www.rndsystems.com/cn/products/human-integrin-alphavbeta3-antibody-23c6_mab3050">https://www.rndsystems.com/cn/products/human-integrin-alphavbeta3-antibody-23c6_mab3050</a>             |
| $\alpha\beta 5$      | R&D              | MAB2528   | Co-IP:1:50                                                  |                                    | <a href="https://www.rndsystems.com/cn/products/human-integrin-alphavbeta5-antibody-p5h9_mab2528">https://www.rndsystems.com/cn/products/human-integrin-alphavbeta5-antibody-p5h9_mab2528</a>             |
| $\alpha\beta 3$      | Abcam            | ab190147  | Neutralizing:<br>8 $\mu$ g/5 $\times$ 10 <sup>4</sup> cells |                                    | <a href="https://www.abcam.cn/integrin-alpha-v-beta-3-antibody-lm609-ab190147.html">https://www.abcam.cn/integrin-alpha-v-beta-3-antibody-lm609-ab190147.html</a>                                         |
| $\alpha\beta 5$      | Abcam            | ab177004  | Neutralizing:<br>8 $\mu$ g/5 $\times$ 10 <sup>4</sup> cells |                                    | <a href="https://www.abcam.cn/integrin-alpha-vbeta-5-antibody-p1f6-ab177004.html">https://www.abcam.cn/integrin-alpha-vbeta-5-antibody-p1f6-ab177004.html</a>                                             |
| TNF- $\alpha$        | Abcam            | ab9739    | IHC: 1:200<br>WB: 1:1000                                    |                                    | <a href="https://www.abcam.cn/tnf-alpha-antibody-ab9739.html">https://www.abcam.cn/tnf-alpha-antibody-ab9739.html</a>                                                                                     |
| IL-1 $\beta$         | Abcam            | ab9722    | IHC: 1:400<br>WB: 1:1000                                    |                                    | <a href="https://www.abcam.cn/il-1-beta-antibody-ab9722.html">https://www.abcam.cn/il-1-beta-antibody-ab9722.html</a>                                                                                     |
| F4/80                | Abcam            | ab16911   | IF: 1:100                                                   |                                    | <a href="https://www.abcam.cn/f480-antibody-bm8-ab16911.html">https://www.abcam.cn/f480-antibody-bm8-ab16911.html</a>                                                                                     |
| DDDDK tag (flag tag) | Abcam            | ab205606  | IF: 1:100                                                   |                                    | <a href="https://www.abcam.cn/ddddk-tag-binds-to-flag-tag-sequence-antibody-epr20018-251-ab205606.html">https://www.abcam.cn/ddddk-tag-binds-to-flag-tag-sequence-antibody-epr20018-251-ab205606.html</a> |

|                              |                           |            |                  |  |                                                                                                                                                                                                                                                                                                                                                               |
|------------------------------|---------------------------|------------|------------------|--|---------------------------------------------------------------------------------------------------------------------------------------------------------------------------------------------------------------------------------------------------------------------------------------------------------------------------------------------------------------|
| PE-Anti DDDDK tag (flag tag) | Abcam                     | ab72469    | Flow cyt : 1:500 |  | <a href="https://www.abcam.cn/pe-ddddk-tag-binds-to-flag-tag-sequence-antibody-m2-ab72469.html">https://www.abcam.cn/pe-ddddk-tag-binds-to-flag-tag-sequence-antibody-m2-ab72469.html</a>                                                                                                                                                                     |
| p-NF-kappa B p65 Ser536      | Cell Signaling Technology | 3033S      | WB: 1:1000       |  | <a href="https://www.cellsignal.cn/products/primary-antibodies/phospho-nf-kb-p65-ser536-93h1-rabbit-mab/3033?_=1607148869547&amp;Ntt=phospho%20NF&amp;tahead=true">https://www.cellsignal.cn/products/primary-antibodies/phospho-nf-kb-p65-ser536-93h1-rabbit-mab/3033?_=1607148869547&amp;Ntt=phospho%20NF&amp;tahead=true</a>                               |
| NF-kappa B p65               | Abcam                     | ab16502    | WB: 1:1000       |  | <a href="https://www.abcam.cn/nf-kb-p65-antibody-ab16502.html">https://www.abcam.cn/nf-kb-p65-antibody-ab16502.html</a>                                                                                                                                                                                                                                       |
| $\beta$ -actin               | Cell Signaling Technology | 4970S      | WB: 1:1000       |  | <a href="https://www.cellsignal.cn/products/primary-antibodies/b-actin-13e5-rabbit-mab/4970?N=4294956287&amp;Ntt=4970s&amp;fromPage=plp">https://www.cellsignal.cn/products/primary-antibodies/b-actin-13e5-rabbit-mab/4970?N=4294956287&amp;Ntt=4970s&amp;fromPage=plp</a>                                                                                   |
| GAPDH                        | Abcam                     | Ab9485     | WB: 1:1000       |  | <a href="https://www.abcam.cn/gapdh-antibody-loading-control-ab9485.html">https://www.abcam.cn/gapdh-antibody-loading-control-ab9485.html</a>                                                                                                                                                                                                                 |
| Integrin subunit $\alpha$ v  | Proteintech               | 27096-1-AP | WB: 1:1000       |  | <a href="https://www.ptgcn.com/products/ITGAV-Antibody-27096-1-AP.htm">https://www.ptgcn.com/products/ITGAV-Antibody-27096-1-AP.htm</a>                                                                                                                                                                                                                       |
| Integrin subunit $\beta$ 3   | Proteintech               | 18309-1-AP | WB: 1:1000       |  | <a href="https://www.ptgcn.com/products/ITGB3-Antibody-18309-1-AP.htm">https://www.ptgcn.com/products/ITGB3-Antibody-18309-1-AP.htm</a>                                                                                                                                                                                                                       |
| Integrin subunit $\beta$ 5   | Proteintech               | 28543-1-AP | WB: 1:1000       |  | <a href="https://www.ptgcn.com/products/Integrin-beta-5-Antibody-28543-1-AP.htm">https://www.ptgcn.com/products/Integrin-beta-5-Antibody-28543-1-AP.htm</a>                                                                                                                                                                                                   |
| p-FAK Tyr397                 | Cell Signaling Technology | 8556T      | WB: 1:1000       |  | <a href="https://www.cellsignal.cn/products/primary-antibodies/phospho-fak-tyr397-d20b1-rabbit-mab/8556?N=4294956287&amp;Ntt=8556t&amp;fromPage=plp">https://www.cellsignal.cn/products/primary-antibodies/phospho-fak-tyr397-d20b1-rabbit-mab/8556?N=4294956287&amp;Ntt=8556t&amp;fromPage=plp</a>                                                           |
| FAK                          | Abcam                     | ab40794    | WB: 1:1000       |  | <a href="https://www.abcam.cn/fak-antibody-ep695y-ab40794.html">https://www.abcam.cn/fak-antibody-ep695y-ab40794.html</a>                                                                                                                                                                                                                                     |
| p-p38 MAPK Thr180/Tyr182     | Cell Signaling Technology | 4511S      | WB: 1:1000       |  | <a href="https://www.cellsignal.cn/products/primary-antibodies/phospho-p38-mapk-thr180-tyr182-d3f9-xp-rabbit-mab/4511?N=4294956287&amp;Ntt=4511s&amp;fromPage=plp">https://www.cellsignal.cn/products/primary-antibodies/phospho-p38-mapk-thr180-tyr182-d3f9-xp-rabbit-mab/4511?N=4294956287&amp;Ntt=4511s&amp;fromPage=plp</a>                               |
| p-38 MAPK                    | Cell Signaling Technology | 8690S      | WB: 1:1000       |  | <a href="https://www.cellsignal.cn/products/primary-antibodies/p38-mapk-d13e1-xp-rabbitmab/8690?N=4294956287&amp;Ntt=8690s&amp;fromPage=plp">https://www.cellsignal.cn/products/primary-antibodies/p38-mapk-d13e1-xp-rabbitmab/8690?N=4294956287&amp;Ntt=8690s&amp;fromPage=plp</a>                                                                           |
| p-ERK Thr202/Tyr204          | Cell Signaling Technology | 4370S      | WB: 1:1000       |  | <a href="https://www.cellsignal.cn/products/primary-antibodies/phospho-p44-42-mapk-erk1-2-thr202-tyr204-d13-14-4e-xp-rabbit-mab/4370?N=4294956287&amp;Ntt=4370s&amp;fromPage=plp">https://www.cellsignal.cn/products/primary-antibodies/phospho-p44-42-mapk-erk1-2-thr202-tyr204-d13-14-4e-xp-rabbit-mab/4370?N=4294956287&amp;Ntt=4370s&amp;fromPage=plp</a> |
| ERK                          | Cell Signaling Technology | 4695S      | WB: 1:1000       |  | <a href="https://www.cellsignal.cn/products/primary-antibodies/p44-42-mapk-erk1-2-">https://www.cellsignal.cn/products/primary-antibodies/p44-42-mapk-erk1-2-</a>                                                                                                                                                                                             |

|                  |                           |         |                            |  |                                                                                                                                                                                                                                                                                                                                                                     |
|------------------|---------------------------|---------|----------------------------|--|---------------------------------------------------------------------------------------------------------------------------------------------------------------------------------------------------------------------------------------------------------------------------------------------------------------------------------------------------------------------|
|                  |                           |         |                            |  | 137f5rabbitmab/4695?N=4294956287&Ntt=4695s&fromPage=plp                                                                                                                                                                                                                                                                                                             |
| p-Akt Thr308     | Cell Signaling Technology | 4056S   | WB: 1:1000                 |  | <a href="https://www.cellsignal.cn/products/primary-antibodies/phospho-akt-thr308-244f9-rabbit-mab/4056?_=1618738992391&amp;Ntt=phospho%20akt%20308&amp;tahead=true">https://www.cellsignal.cn/products/primary-antibodies/phospho-akt-thr308-244f9-rabbit-mab/4056?_=1618738992391&amp;Ntt=phospho%20akt%20308&amp;tahead=true</a>                                 |
| Akt              | Cell Signaling Technology | 4691S   | WB: 1:1000                 |  | <a href="https://www.cellsignal.cn/products/primary-antibodies/akt-pan-11e7-rabbit-mab/4685?site-search-type=Products&amp;N=4294956287&amp;Ntt=akt+pan&amp;fromPage=plp">https://www.cellsignal.cn/products/primary-antibodies/akt-pan-11e7-rabbit-mab/4685?site-search-type=Products&amp;N=4294956287&amp;Ntt=akt+pan&amp;fromPage=plp</a>                         |
| p-AMPK Thr172    | Cell Signaling Technology | 50081S  | WB: 1:1000                 |  | <a href="https://www.cellsignal.cn/products/primary-antibodies/phospho-ampka-thr172-d4d6d-rabbit-mab/50081?site-search-type=Products&amp;N=4294956287&amp;Ntt=ampk&amp;fromPage=plp">https://www.cellsignal.cn/products/primary-antibodies/phospho-ampka-thr172-d4d6d-rabbit-mab/50081?site-search-type=Products&amp;N=4294956287&amp;Ntt=ampk&amp;fromPage=plp</a> |
| AMPK             | Cell Signaling Technology | 5831S   | WB: 1:1000                 |  | <a href="https://www.cellsignal.cn/products/primary-antibodies/ampka-d5a2-rabbit-mab/5831?site-search-type=Products&amp;N=4294956287&amp;Ntt=ampk&amp;fromPage=plp">https://www.cellsignal.cn/products/primary-antibodies/ampka-d5a2-rabbit-mab/5831?site-search-type=Products&amp;N=4294956287&amp;Ntt=ampk&amp;fromPage=plp</a>                                   |
| CD68             | Cell Signaling Technology | 97778S  | IF: 1:200                  |  | <a href="https://www.cellsignal.cn/products/primary-antibodies/cd68-e3o7v-rabbit-mab/97778?_=1618739773380&amp;Ntt=97778&amp;tahead=true">https://www.cellsignal.cn/products/primary-antibodies/cd68-e3o7v-rabbit-mab/97778?_=1618739773380&amp;Ntt=97778&amp;tahead=true</a>                                                                                       |
| Rac1             | Abcam                     | Ab33186 | WB: 1:1000                 |  | <a href="https://www.abcam.cn/rac1-antibody-23a8-ab33186.html">https://www.abcam.cn/rac1-antibody-23a8-ab33186.html</a>                                                                                                                                                                                                                                             |
| ITLN1(omentin-1) | Affinity Bioscience LTD.  | DF12413 | Co-IP: 1:100<br>WB: 1:1000 |  | <a href="http://www.affbiotech.com/goods-15503-DF12413-ITLN1+Antibody.html">http://www.affbiotech.com/goods-15503-DF12413-ITLN1+Antibody.html</a>                                                                                                                                                                                                                   |

### DNA/cDNA Clones

| Clone Name                  | Forward sequence<br>(5' to 3') | Reverse sequence<br>(5' to 3') | Source /<br>Repository              |
|-----------------------------|--------------------------------|--------------------------------|-------------------------------------|
| Mouse ITGAV primer          | GTGTGAGGAACTGGTCGCCTAT         | CCGTTCTCTGGTCCAACCGATA         | Invitrogen                          |
| Mouse GAPDH primer          | CATCACTGCCACCCAGAAGACTG        | ATGCCAGTGAGCTTCCCGTTCAG        | Invitrogen                          |
| ITGAV siRNA                 | GACCCGUUGUCACUGUAAATT          | UUUACAGUGACAACGGGUCTT          | GenePharma Co., Ltd (Suzhou, China) |
| NC (negative control) siRNA | UUCUCCGAACGUGUCACGUTT          | ACGUGACACGUUCGGAGAATT          | GenePharma Co., Ltd (Suzhou, China) |

DOI [to be added]

## Cultured Cells

| Name     | Vendor or Source                        | Sex (F, M, or unknown) | Persistent ID / URL                                                             |
|----------|-----------------------------------------|------------------------|---------------------------------------------------------------------------------|
| THP1     | Cyagen Bioscience<br>(Guangzhou, China) | unknown                | <a href="https://www.cyagen.com/cn/zh-cn/">https://www.cyagen.com/cn/zh-cn/</a> |
| RAW264.7 | Cyagen Bioscience<br>(Guangzhou, China) | unknown                | <a href="https://www.cyagen.com/cn/zh-cn/">https://www.cyagen.com/cn/zh-cn/</a> |

## Other

| Description                                           | Source / Repository                       | Persistent ID / URL                                                                                                                                                               |
|-------------------------------------------------------|-------------------------------------------|-----------------------------------------------------------------------------------------------------------------------------------------------------------------------------------|
| Western diet                                          | Beijing HFK<br>Bioscience, H10141         | <a href="http://www.hfkbio.com/">http://www.hfkbio.com/</a>                                                                                                                       |
| Mounting Medium with DAPI                             | Abcam, ab104139                           | <a href="https://www.abcam.cn/mounting-medium-with-dapi-aqueous-fluoroshield-ab104139.html">https://www.abcam.cn/mounting-medium-with-dapi-aqueous-fluoroshield-ab104139.html</a> |
| Mouse IgG1 isotype                                    | R&D, MAB002                               | <a href="https://www.rndsystems.com/cn/products/mouse-igg-1-isotype-control_mab002">https://www.rndsystems.com/cn/products/mouse-igg-1-isotype-control_mab002</a>                 |
| ALZET osmotic minipumps                               | ALZET Model 2004;<br>Cupertino, CA, USA   | <a href="https://www.alzet.com/">https://www.alzet.com/</a>                                                                                                                       |
| oil red o stain kit                                   | Solarbio Life Science,<br>G1262           | <a href="http://www.solarbio.com/goods-9953.html">http://www.solarbio.com/goods-9953.html</a>                                                                                     |
| masson's trichrome stain kit                          | Solarbio Life Science,<br>G1340           | <a href="http://www.solarbio.com/goods-475.html">http://www.solarbio.com/goods-475.html</a>                                                                                       |
| Cilengitide                                           | MedChemExpress,<br>HY-16141               | <a href="https://www.medchemexpress.com/Cilengitide.html">https://www.medchemexpress.com/Cilengitide.html</a>                                                                     |
| HE staining kit                                       | Solarbio Life Science,<br>G1121           | <a href="http://www.solarbio.com/goods-65944.html">http://www.solarbio.com/goods-65944.html</a>                                                                                   |
| Omentin-1 ELISA kit                                   | Biovendor,<br>RD191100200R                | <a href="https://www.biovendor.com/omentin-1-human-elisa?d=114">https://www.biovendor.com/omentin-1-human-elisa?d=114</a>                                                         |
| Phorbol 12-myristate 13-acetate                       | Sigma-Aldrich, P1585                      | <a href="https://www.sigmaaldrich.com/catalog/product/sigma/p1585?lang=zh&amp;region=CN">https://www.sigmaaldrich.com/catalog/product/sigma/p1585?lang=zh&amp;region=CN</a>       |
| mild ox-LDL                                           | Yiyuan Biotech,<br>Guangzhou, YB-002      | <a href="http://www.yiyuanbiotech.com/PRO.asp?id=562">http://www.yiyuanbiotech.com/PRO.asp?id=562</a>                                                                             |
| high ox-LDL                                           | Yiyuan Biotech,<br>Guangzhou, high ox-LDL | <a href="http://www.yiyuanbiotech.com/PRO.asp?id=562">http://www.yiyuanbiotech.com/PRO.asp?id=562</a>                                                                             |
| human recombinant ITLN1 (omentin-1), flag tag labeled | Abcam, ab157030<br>Lot:GR155015-11        | <a href="https://www.abcam.cn/recombinant-human-itln1-protein-ab157030.html">https://www.abcam.cn/recombinant-human-itln1-protein-ab157030.html</a>                               |
| human recombinant ITLN1 (omentin-1), his tag labeled  | Abcam, ab207144                           | <a href="https://www.abcam.cn/recombinant-human-itln1-protein-ab207144.html">https://www.abcam.cn/recombinant-human-itln1-protein-ab207144.html</a>                               |

|                                                              |                        |                                                                                                                                                                                                                                                                                             |
|--------------------------------------------------------------|------------------------|---------------------------------------------------------------------------------------------------------------------------------------------------------------------------------------------------------------------------------------------------------------------------------------------|
| CFSE celltrace                                               | Thermo, C34554         | <a href="https://www.thermofisher.com/order/catalog/product/C34554#/C34554">https://www.thermofisher.com/order/catalog/product/C34554#/C34554</a>                                                                                                                                           |
| Cell Tracker Deep Red Dye 630/650                            | Thermo, C34565         | <a href="https://www.thermofisher.com/order/catalog/product/C34565#/C34565">https://www.thermofisher.com/order/catalog/product/C34565#/C34565</a>                                                                                                                                           |
| BAY 11-7082                                                  | Abcam, ab141228        | <a href="https://www.abcam.cn/bay-11-7082-ikappabalpha-kinase-inhibitor-ab141228.html">https://www.abcam.cn/bay-11-7082-ikappabalpha-kinase-inhibitor-ab141228.html</a>                                                                                                                     |
| Recombinant human integrin alpha V beta 5 protein            | R&D, 2528-AV-050       | <a href="https://www.rndsystems.com/cn/products/recombinant-human-integrin-alpha-v-beta-5-protein-cf_2528-av">https://www.rndsystems.com/cn/products/recombinant-human-integrin-alpha-v-beta-5-protein-cf_2528-av</a>                                                                       |
| Recombinant human integrin alpha V beta 3 protein            | R&D, 3050-AV-050       | <a href="https://www.rndsystems.com/cn/products/recombinant-human-integrin-alpha-v-beta-3-protein-cf_3050-av">https://www.rndsystems.com/cn/products/recombinant-human-integrin-alpha-v-beta-3-protein-cf_3050-av</a>                                                                       |
| In situ cell death detection kit, fluorescence (TUNEL assay) | Roche, 11684795910     | <a href="https://www.sigmaaldrich.com/catalog/product/roche/11684795910?lang=zh&amp;region=CN">https://www.sigmaaldrich.com/catalog/product/roche/11684795910?lang=zh&amp;region=CN</a>                                                                                                     |
| Goat anti-rabbit IgG, H&L (Alexa Fluor 488)                  | Abcam, ab150077        | <a href="https://www.abcam.cn/goat-rabbit-igg-hl-alexa-fluor-488-ab150077.html">https://www.abcam.cn/goat-rabbit-igg-hl-alexa-fluor-488-ab150077.html</a>                                                                                                                                   |
| Goat anti-mouse IgG, H&L (Alexa Fluor 594)                   | Abcam, ab150116        | <a href="https://www.abcam.cn/goat-mouse-igg-hl-alexa-fluor-594-ab150116.html">https://www.abcam.cn/goat-mouse-igg-hl-alexa-fluor-594-ab150116.html</a>                                                                                                                                     |
| FITC Annexin V Apoptosis Detection Kit I                     | BD pharmingen, 556547  | <a href="https://www.bdbiosciences.com/cn/applications/research/apoptosis/apoptosis-kits-sets/fits-annexin-v-apoptosis-detection-kit-i/p/556547">https://www.bdbiosciences.com/cn/applications/research/apoptosis/apoptosis-kits-sets/fits-annexin-v-apoptosis-detection-kit-i/p/556547</a> |
| Cell dissociation buffer, enzyme-free, PBS                   | Thermofisher, 13151014 | <a href="https://www.thermofisher.com/order/catalog/product/13151014?SID=srch-hj-13151014#/13151014?SID=srch-hj-13151014">https://www.thermofisher.com/order/catalog/product/13151014?SID=srch-hj-13151014#/13151014?SID=srch-hj-13151014</a>                                               |
