# Supplementary material for: Omentin-1 Modulates Macrophage Function via Integrin Receptors αvβ3 and αvβ5 and Reverses Plaque Vulnerability in Animal Models of Atherosclerosis
Source: PubMed Central journal article supplement (PMC8593239; doi:10.3389/fcvm.2021.757926), 2021-11-02
Supplement: Image_1.pdf [file Image_1.pdf]

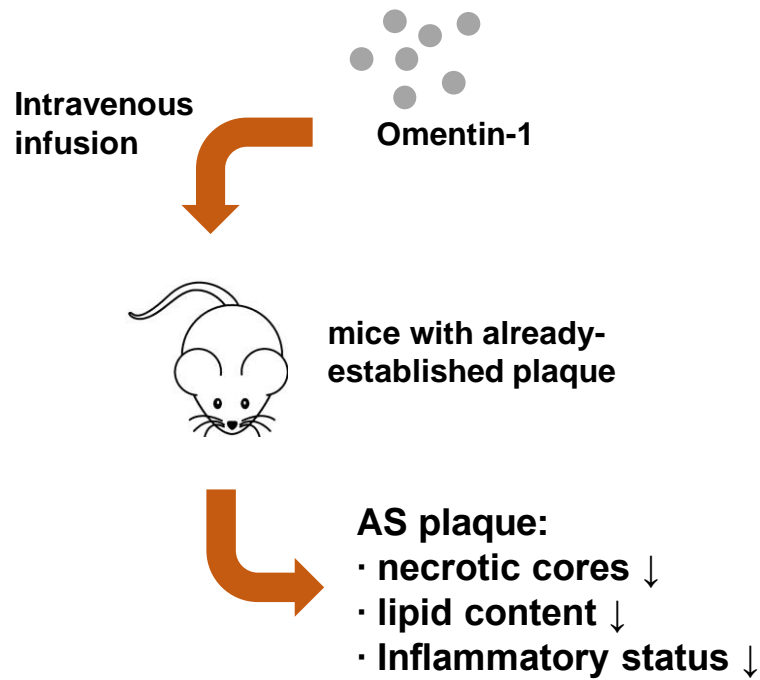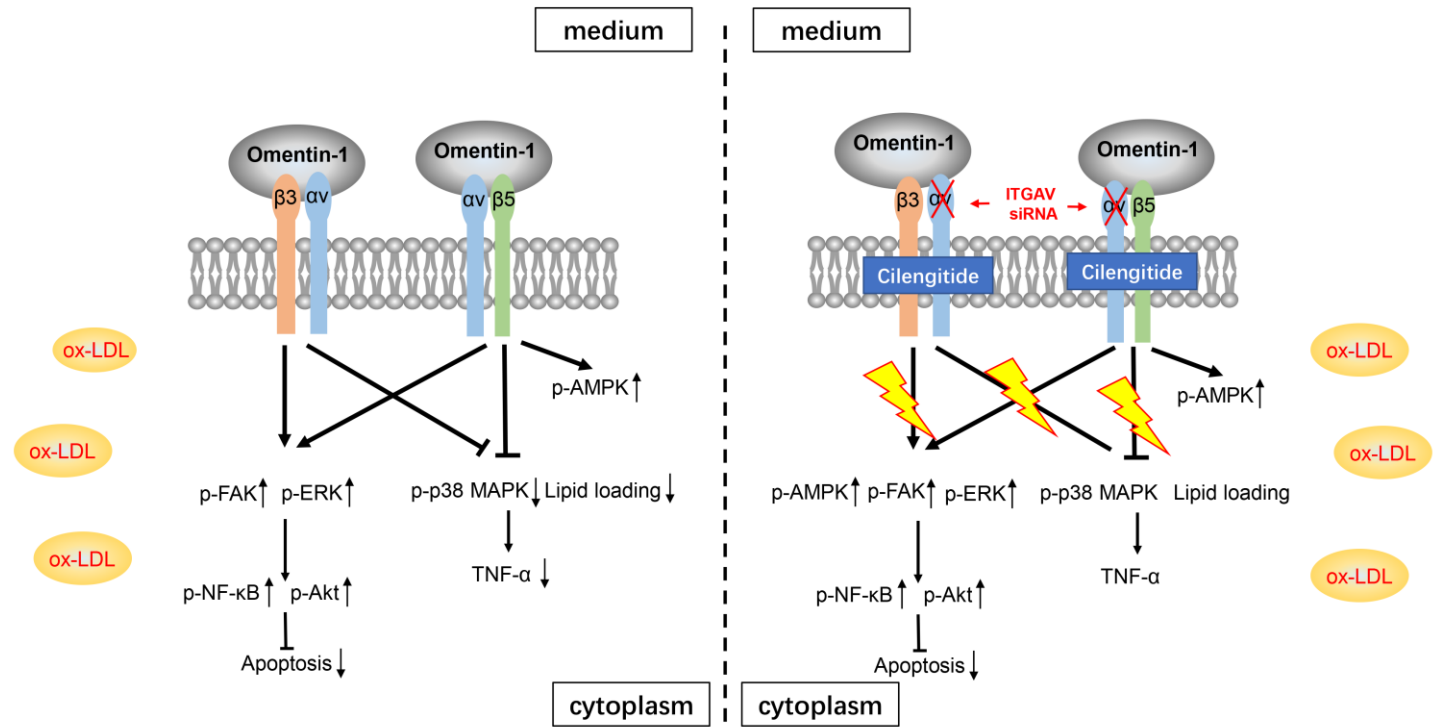

### Highlights:

1. Omentin-1 infusion significantly improved the stability of already-established AS plaque in ApoE-KO mice and Ldlr-KO mice.
2. Omentin-1 attenuated apoptosis, lipid accumulation and inflammatory response induced by ox-LDL in macrophage.
3. Omentin-1 directly bound to integrin receptor  $\alpha\beta3$  and  $\alpha v\beta5$  on cell membrane. Either the use of cilengitide (inhibitor of  $\alpha\beta3$  and  $\alpha v\beta5$ ) or knocking down the expression of integrin subunit  $\alpha v$  abrogated the bioeffects induced by omentin-1.
